# Supplementary material for: Harnessing the Full Power of Chemometric-Based Analysis of Total Reflection X-ray Fluorescence Spectral Data to Boost the Identification of Seafood Provenance and Fishing Areas
Source: MDPI journal article supplement (doi:10.3390/foods11172699), 2022-09-04
Supplement: s1 [file s1]

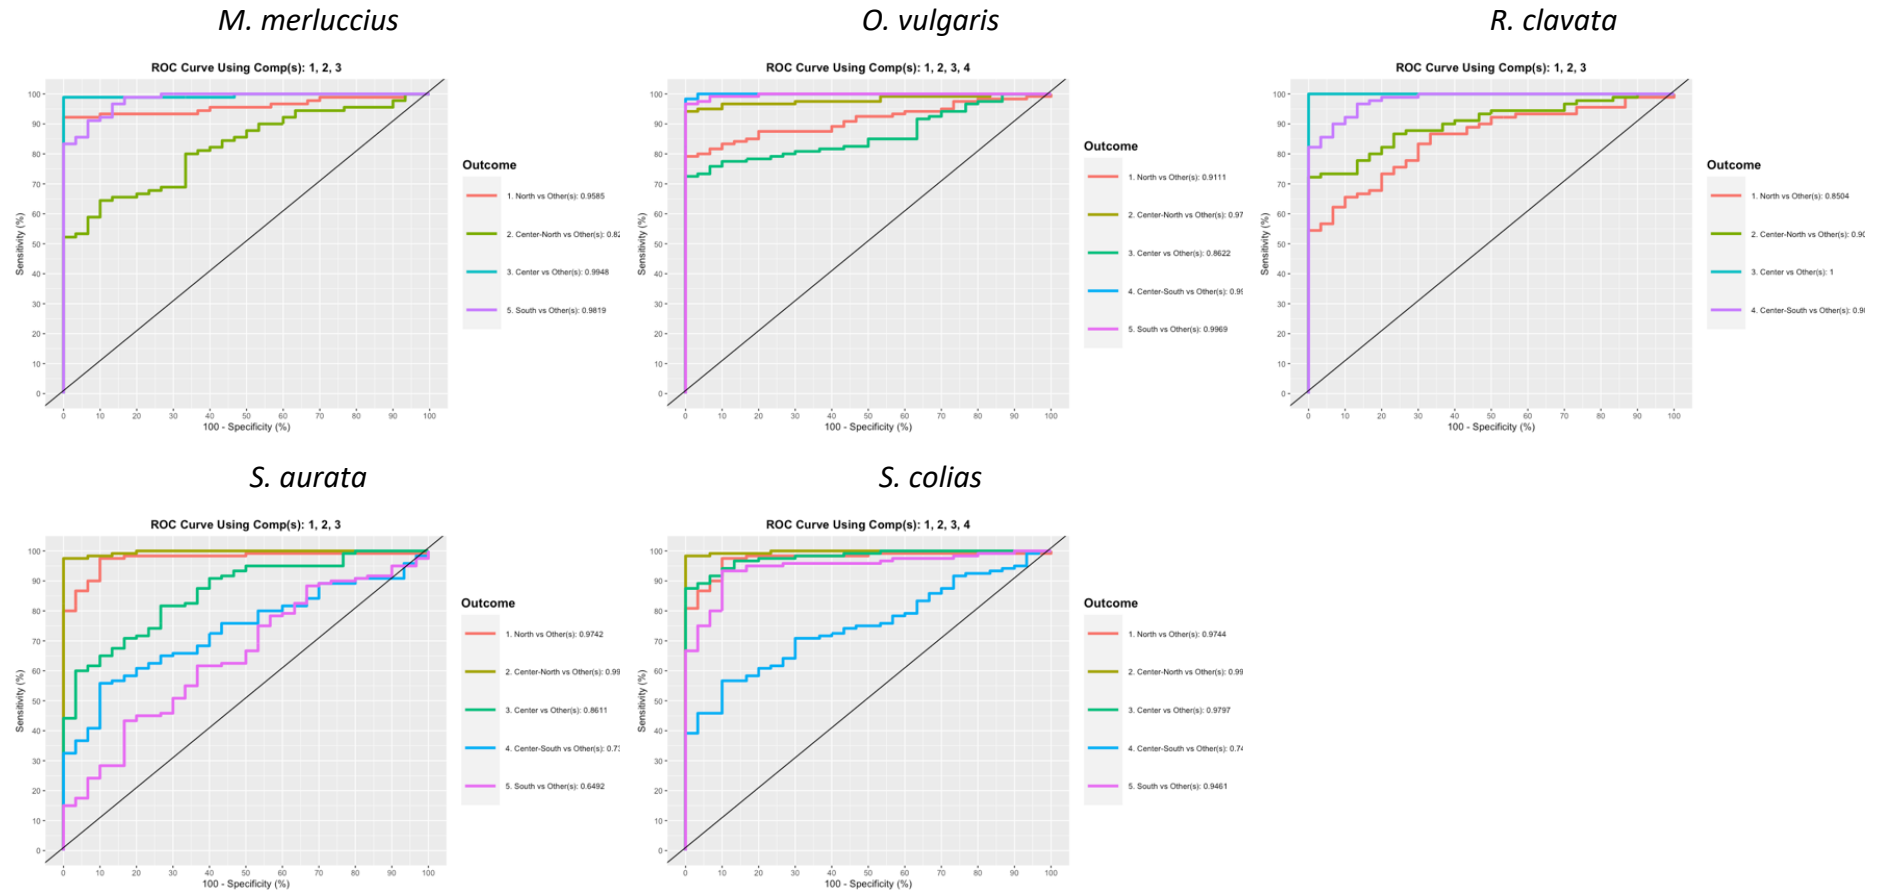

**Figure S1.** Receiver Operating Characteristic (ROC) curves for the number of selected Partial Least-Squares Discriminant Analysis (PLS-DA) components having as input the processed (Savitzky-Golay filter with the first derivative) X-ray fluorescence reflectance spectra of *Merluccius merluccius*, *Octopus vulgaris*, *Raja clavata*, *Sparus aurata* and *Scomber colias* samples collected along the Portuguese coast.
